# Supplementary material for: Systematic expression alteration analysis of master reprogramming factor OCT4 and its three pseudogenes in human cancer and their prognostic outcomes
Source: PubMed Central journal article supplement (PMC6172215; doi:10.1038/s41598-018-33094-7), 2018-10-04
Supplement: 41598_2018_33094_MOESM1_ESM.pdf [file 41598_2018_33094_MOESM1_ESM.pdf]

1 **Systematic expression alteration analysis of master reprogramming factor OCT4 and its**  
2 **three pseudogenes in human cancer and their prognostic outcomes**

3 Subbroto Kumar Saha<sup>†</sup>, Yeojin jeong<sup>†</sup>, Sungha Cho, and Ssang-Goo Cho\*

4  
5 Department of Stem Cell and Regenerative Biotechnology, Incurable Disease Animal Model  
6 & Stem Cell Institute (IDASI), Konkuk University, Seoul 05029, Republic of Korea;  
7 subbroto@konkuk.ac.kr (S.K.S.); jyj05787@gmail.com (Y.J.); shgool@naver.com (S.C.)

8 \* Correspondence: ssangoo@konkuk.ac.kr; Tel: +82 2-450-4207

9 <sup>†</sup> These authors contributed equally to this work.

10  
11  
12  
13  
14  
15  
16  
17  
18  
19  
20  
21  
22  
23  
24

25 **Supplementary Tables**26 **Supplementary Table S1. *OCT4 (POU5F1)* expression in each Cancer types type.**

| <b>Cancer types</b> | <b>Cancer subtypes</b>                    | <b><i>p</i>-value</b> | <b>Fold-change</b> | <b>Rank (%)</b> | <b>Sample</b> | <b>Reference</b> |
|---------------------|-------------------------------------------|-----------------------|--------------------|-----------------|---------------|------------------|
| Bladder             | Superficial Bladder Cancer types          | 1.97E-8               | 5.279              | 1               | 54            | [1]              |
|                     | Superficial Bladder Cancer types          | 1.08E-11              | 4.969              | 9               | 157           | [2]              |
|                     | Infiltrating Bladder Urothelial Carcinoma | 5.79E-6               | 2.067              | 11              | 157           | [2]              |
| Breast              | Invasive Breast Carcinoma                 | 4.12E-29              | -5.513             | 2               | 59            | [3]              |
|                     | Invasive Ductal Breast Carcinoma          | 6.29E-4               | -1.831             | 4               | 66            | [4]              |
|                     | Ductal Breast Carcinoma in Situ           | 3.10E-4               | -1.769             | 4               | 66            | [4]              |
| Colorectal          | Rectal Adenocarcinoma                     | 3.17E-22              | 2.514              | 4               | 130           | [5]              |
|                     | Rectal Adenocarcinoma                     | 9.79E-6               | 1.424              | 2               | 105           | [6]              |
|                     | Cecum Adenocarcinoma                      | 3.39E-8               | 1.567              | 2               | 105           | [6]              |
|                     | Rectosigmoid Adenocarcinoma               | 2.55E-6               | 1.591              | 2               | 105           | [6]              |
| Kidney              | Clear Cell Renal Cell Carcinoma           | 3.95E-5               | 2.941              | 7               | 20            | [7]              |
|                     | Papillary Renal Cell Carcinoma            | 4.86E-6               | 1.426              | 12              | 92            | [8]              |
| Other               | Seminoma, NOS                             | 1.20E-10              | 11.699             | 1               | 107           | [9]              |
|                     | Mixed Germ Cell Tumor, NOS                | 1.24E-9               | 4.005              | 5               | 107           | [9]              |
|                     | Embryonal Carcinoma, NOS                  | 4.93E-7               | 7.100              | 7               | 107           | [9]              |
|                     | Testicular Embryonal Carcinoma            | 9.66E-4               | 11.157             | 2               | 30            | [10]             |
| Ovarian             | Ovarian Serous Adenocarcinoma             | 7.46E-10              | 6.313              | 2               | 53            | [11]             |
|                     | Ovarian Clear Cell Adenocarcinoma         | 7.10E-6               | 1.799              | 3               | 103           | [12]             |
|                     | Ovarian Endometrioid Adenocarcinoma       | 6.99E-7               | 1.388              | 5               | 103           | [12]             |
|                     | Ovarian Serous Adenocarcinoma             | 2.16E-5               | 1.289              | 8               | 103           | [12]             |
| Sarcoma             | Fibrosarcoma                              | 5.78E-5               | -4.038             | 1               | 53            | [13]             |
|                     | Leiomyosarcoma                            | 1.57E-4               | -1.187             | 11              | 158           | [14]             |

27 **\*Abbreviations:** NOS - Not Otherwise Specified

28 **Supplementary Table S2.** Association of *OCT4* expression and survival of Cancer types patients  
 29 (Prognoscan).

| <b>Cancer types</b> | <b>N</b> | <b>Cox <i>p</i>-value</b> | <b>HR</b> | <b>Endpoint</b>           | <b>Dataset</b> | <b>Probe ID</b>   |
|---------------------|----------|---------------------------|-----------|---------------------------|----------------|-------------------|
| Lung                | 117      | 0.001101                  | 0.6       | Overall Survival          | GSE13213       | A_23_P59138       |
|                     | 117      | 0.002718                  | 0.67      | Overall Survival          | GSE13213       | A_24_P144601      |
|                     | 117      | 0.005945                  | 0.71      | Overall Survival          | GSE13213       | A_24_P214841      |
|                     | 117      | 0.014269                  | 0.68      | Overall Survival          | GSE13213       | A_32_P132563      |
|                     | 86       | 0.021249                  | 0.49      | Overall Survival          | MICHIGAN-LC    | Z11899_s_at       |
| Ovarian             | 110      | 0.016227                  | 0.84      | Overall Survival          | GSE17260       | A_24_P214841      |
|                     | 110      | 0.024797                  | 0.82      | Progression Free Survival | GSE17260       | A_24_P214841      |
|                     | 185      | 0.026745                  | 0.61      | Disease Free Survival     | GSE26712       | 208286_x_at       |
|                     | 110      | 0.027991                  | 0.82      | Progression Free Survival | GSE17260       | A_24_P144601      |
|                     | 110      | 0.041767                  | 0.85      | Progression Free Survival | GSE17260       | A_23_P59138       |
|                     | 110      | 0.048337                  | 0.83      | Progression Free Survival | GSE17260       | A_32_P132563      |
|                     | 110      | 0.033365                  | 0.85      | Overall Survival          | GSE17260       | A_24_P144601      |
| Blood               | 53       | 0.042983                  | 1.29      | Event Free Survival       | E-TABM-346     | 208286_x_at       |
|                     | 53       | 0.04875                   | 1.37      | Overall Survival          | E-TABM-346     | 208286_x_at       |
| Colorectal          | 55       | 0.04826                   | 0.16      | Overall Survival          | GSE17537       | 208286_x_at       |
| Breast              | 77       | 0.020204                  | 3.18      | Relapse Free Survival     | GSE9195        | 208286B1:H17_x_at |

30

31

32

33

34

35 **Supplementary Table S3.** Alteration frequency of a five-gene signature (*POU5F1*, *SOX2*,  
 36 *NANOG*, *LIN28A*, *KLF4*) in Cancer types.

| Cancer types         | Data source                  | N   | Frequency (%) | Amplification % (N) | Deletion % (N) | Mutation % (N) | Multiple alterations % (N) |
|----------------------|------------------------------|-----|---------------|---------------------|----------------|----------------|----------------------------|
| Lung squ.            | TCGA                         | 178 | 57.30         | 55.06 (1)           | -              | 0.56 (1)       | 1.69 (3)                   |
| Ovarian              | TCGA                         | 316 | 36.71         | 35.76 (113)         | 0.63 (2)       | 0.32 (1)       | -                          |
| NEP                  | Trento/Comell/<br>Broad 2016 | 107 | 31.78         | -                   | -              | 0.93 (1)       | -                          |
| Esophagus            | TCGA                         | 184 | 29.35         | 27.17 (50)          | 1.63 (3)       | 0.54 (1)       | -                          |
| Head & Neck          | TCGA                         | 504 | 25.60         | 23.41 (118)         | 0.4 (2)        | 1.59 (8)       | 0.2 (1)                    |
| NSCLC                | MSK, JCO<br>2018             | 240 | 25.00         | 20.19 (231)         | 1.31 (15)      | 2.8 (32)       | 0.7 (8)                    |
| Testicular germ cell | TCGA                         | 149 | 22.82         | 20.81 (31)          | -              | 2.01 (3)       | -                          |
| Cervical             | TCGA                         | 191 | 21.99         | 17.28 (33)          | 1.05 (2)       | 3.14 (6)       | 0.52 (1)                   |
| Pancreas             | UTSW                         | 109 | 20.18         | 9.17 (10)           | 9.17 (10)      | -              | 1.83 (2)                   |

37 **\*Abbreviations:** Lung squ.- Lung Squamous Cell Carcinoma ; NEP - Neuroendocrine Prostate ; NSCLC - Non-  
 38 Small Cell Lung Cancer types -

39

40

41

42

43

44

45

46

47

48

49 **Supplementary Table S4.** Alteration frequency of a seven-gene signature (*POU5F1*, *SOX2*,  
 50 *NANOG*, *LIN28A*, *KLF4*, *SALL4*, *FGF2*) in Cancer types.

| Cancer types         | Data source                   | N   | Frequency (%) | Amplification % (N) | Deletion % (N) | Mutation % (N) | Multiple alterations % (N) |
|----------------------|-------------------------------|-----|---------------|---------------------|----------------|----------------|----------------------------|
| Lung squ             | TCGA                          | 178 | 60.67         | 54.49 (97)          | -              | 2.81 (5)       | 3.37 (6)                   |
| Ovarian              | TCGA                          | 316 | 41.77         | 37.66 (119)         | 1.9 (6)        | 0.63 (2)       | 1.58 (5)                   |
| NEP                  | Trento/Comelll/<br>Broad 2016 | 107 | 38.32         | 37.38 (40)          | -              | 0.93 (1)       | -                          |
| Esophagus            | TCGA                          | 184 | 34.78         | 30.98 (57)          | 2.17 (4)       | 1.63 (3)       | -                          |
| Head & Neck          | TCGA                          | 504 | 26.79         | 23.02 (116)         | 0.79 (4)       | 2.38 (12)      | 0.6 (3)                    |
| NSCLC                | MSK, JCO 2018                 | 240 | 29.02         | 20.89 (239)         | 1.31 (15)      | 5.33 (61)      | 1.49 (17)                  |
| Stomach/Esophageal   | TCGA                          | 265 | 28.30         | 23.02 (61)          | 3.4 (9)        | 1.13 (3)       | 0.75 (2)                   |
| Stomach              | TCGA                          | 393 | 26.21         | 15.27 (60)          | 2.54 (10)      | 7.12 (28)      | 1.27 (5)                   |
| Pancreas             | UTSW                          | 109 | 25.69         | 11.01 (12)          | 11.01 (12)     | -              | 3.67 (4)                   |
| Cervical             | TCGA                          | 191 | 25.13         | 17.8 (34)           | 1.57 (3)       | 4.71 (9)       | 1.05 (2)                   |
| Testicular germ cell | TCGA                          | 149 | 23.49         | 20.81 (31)          | -              | 2.68 (4)       | -                          |
| The MBC project      | Provisional,<br>October 2017  | 103 | 21.36         | 14.56 (15)          | 2.91 (3)       | 2.91 (3)       | 0.97 (1)                   |
| Melanoma             | TCGA                          | 287 | 21.25         | 6.62 (19)           | 0.7 (2)        | 11.5 (33)      | 2.44 (7)                   |

51 **\*Abbreviations:** Lung squ.- Lung Squamous Cell Carcinoma ; NEP - Neuroendocrine Prostate ; NSCLC - Non-  
 52 Small Cell Lung Cancer types ; The MBC project – The Metastatic Breast Cancer types Project.

53

54

55

56

57

58

59

60

61 **Supplementary Table S5.** Percentages of alterations in *POU5F1*, *SOX2*, *NANOG*, *KLF4*,  
62 and *LIN28a*.

| <b>Cancer types</b>  | <b><i>POU5F1</i></b> | <b><i>SOX2</i></b> | <b><i>NANOG</i></b> | <b><i>KLF4</i></b> | <b><i>LIN28a</i></b> |
|----------------------|----------------------|--------------------|---------------------|--------------------|----------------------|
| Lung squ             | 0.6%                 | 54.0%              | 8.0%                | 0.6%               | 0.0%                 |
| Ovarian              | 6.0%                 | 26.0%              | 9.0%                | 0.7%               | 1.7%                 |
| NEP                  | 19.0%                | 29.0%              | 14.0%               | 9.0%               | 29.0%                |
| Esophagus            | 5.0%                 | 3.0%               | 1.6%                | 1.6%               | 1.1%                 |
| Head & Neck          | 1.2%                 | 21.0%              | 1.8%                | 1.8%               | 0.8%                 |
| NSCLC                | 1.4%                 | 20.0%              | 3.0%                | 1.1%               | 1.2%                 |
| Testicular germ cell | 0.7%                 | 1.3%               | 21.0%               | 0.0%               | 0.0%                 |
| Cervical             | 2.1%                 | 18.0%              | 0.5%                | 1.6%               | 0.5%                 |
| Pancreas             | 9.0%                 | 7.0%               | 4.0%                | 0.9%               | 8.0%                 |

63

64

65

66

67

68

69

70

71

72

73

74

75

76

77

78 **Supplementary Table S6.** Percentages of alterations in *POU5F1*, *SOX2*, *NANOG*, *KLF4*,  
 79 *LIN28a*, *SALL4*, and *FGF2*.

| <b>Cancer types</b>  | <b><i>POU5F1</i></b> | <b><i>SOX2</i></b> | <b><i>NANOG</i></b> | <b><i>KLF4</i></b> | <b><i>LIN28a</i></b> | <b><i>SALL4</i></b> | <b><i>FGF2</i></b> |
|----------------------|----------------------|--------------------|---------------------|--------------------|----------------------|---------------------|--------------------|
| Lung squ             | 0.6%                 | 54.0%              | 8.0%                | 0.6%               | 0.0%                 | 4.0%                | 1.7%               |
| Ovarian              | 6.0%                 | 26.0%              | 9.0%                | 0.7%               | 1.7%                 | 8.0%                | 1.9%               |
| NEP                  | 19.0%                | 29.0%              | 14.0%               | 9.0%               | 29.0%                | 27.0%               | 10.0%              |
| Esophagus            | 5.0%                 | 23.0%              | 1.6%                | 1.6%               | 1.1%                 | 8.0%                | 0.5%               |
| Head & Neck          | 1.2%                 | 21.0%              | 1.8%                | 1.8%               | 0.8%                 | 1.2%                | 0.8%               |
| NSCLC                | 1.4%                 | 20.0%              | 3.0%                | 1.1%               | 1.2%                 | 5.0%                | 0.3%               |
| Stomach/esophageal   | 6.0%                 | 7.0%               | 2.6%                | 80.0%              | 1.5%                 | 13.0%               | 1.9%               |
| Stomach              | 4.0%                 | 7.0%               | 2.3%                | 3.0%               | 1.5%                 | 13.0%               | 1.5%               |
| Pancreas             | 9.0%                 | 7.0%               | 4.0%                | 0.9%               | 8.0%                 | 7.0%                | 5.0%               |
| Cervical             | 2.1%                 | 18.0%              | 0.5%                | 1.6%               | 0.5%                 | 3.0%                | 1.6%               |
| Testicular germ cell | 7.0%                 | 1.3%               | 21.0%               | 0.0%               | 0.0%                 | 0.7%                | 0.0%               |
| The MBC project      | 1.3%                 | 2.6%               | 6.0%                | 5.0%               | 1.3%                 | 10.0%               | 0%                 |
| Melanoma             | 7.0%                 | 1.0%               | 3.0%                | 1.7%               | 2.1%                 | 9.0%                | 1.4%               |

80

81

82

83

84

85

86

87

88

89

90

91

92

93

94 **Supplementary Table S7.** *POU5F1P1* expression in each Cancer types.

| <b>Cancer types</b> | <b>Cancer subtype</b>                      | <b><i>p</i>-value</b> | <b>Fold change</b> | <b>Rank (%)</b> | <b>Sample</b> | <b>Reference</b> |
|---------------------|--------------------------------------------|-----------------------|--------------------|-----------------|---------------|------------------|
| Breast              | Invasive Ductal Breast Carcinoma           | 6.29E-04              | -1.832             | 4               | 66            | [4]              |
| Kidney              | clear cell renal cell carcinoma            | 5.21E-06              | 3.752              | 3               | 67            | [11]             |
|                     | Papillary Renal Cell Carcinoma             | 7.24E-04              | 2.27               | 6               | 67            | [11]             |
|                     | Clear Cell Renal Cell Carcinoma            | 5.09E-05              | 2.302              | 7               | 20            | [7]              |
|                     | Hereditary Clear Cell Renal Cell Carcinoma | 1.99E-05              | 1.575              | 15              | 70            | [15]             |
| Melanoma            | Cutaneous Melanoma                         | 4.97E-09              | -3.91              | 3               | 70            | [16]             |
|                     | Benign Melanocytic Skin Nevus              | 3.31E-04              | -1.964             | 7               | 70            | [16]             |
| Other               | Seminoma, NOS                              | 1.26E-12              | 10.539             | 1               | 107           | [9]              |
|                     | Mixed Germ Cell Tumor, NOS                 | 1.36E-10              | 4.308              | 4               | 107           | [9]              |
|                     | Embryonal Carcinoma, NOS                   | 4.73E-07              | 7.348              | 7               | 107           | [9]              |

95

96

97

98

99

100

101

102

103

104

105

106

107



108 **Supplementary Table S8.** Association of *POU5F1P1* expression and survival in cancer  
 109 patients (Prognoscan).

| Cancer types | N   | Cox <i>p</i> -value | HR   | Endpoint                         | Dataset  | Probe ID    |
|--------------|-----|---------------------|------|----------------------------------|----------|-------------|
| Lung         | 204 | 0.005102            | 0.46 | Relapse Free Survival            | GSE31210 | 214532_x_at |
|              | 204 | 0.02751             | 0.45 | Overall Survival                 | GSE31210 | 214532_x_at |
|              | 41  | <u>0.01576</u>      | 1.72 | Overall Survival                 | GSE11117 | H300010272  |
| Ovarian      | 185 | 0.017548            | 0.55 | Disease Free Survival            | GSE26712 | 214532_x_at |
|              | 185 | <u>0.040673</u>     | 0.61 | Overall Survival                 | GSE26712 | 214532_x_at |
| Breast       | 136 | <u>0.011783</u>     | 1    | Distant Metastasis Free Survival | GSE12093 | 214532_x_at |

110 \* “      ” represents corrected *p*-value

111

112

113

114

115

116

117

118

119

120

121

122

123

124

125

126 **Supplementary Table S9.** Alteration frequency of a three-gene signature (*POU5F1P1*,  
 127 *PRDM14*, *FAM84B*) in Cancer.

| <b>Cancer types</b> | <b>Data source</b>        | <b>N</b> | <b>Frequency (%)</b> | <b>Amplification % (N)</b> | <b>Deletion % (N)</b> | <b>Mutation % (N)</b> | <b>Multiple alterations % (N)</b> |
|---------------------|---------------------------|----------|----------------------|----------------------------|-----------------------|-----------------------|-----------------------------------|
| NEP                 | Trento/Comell/Broad 2016  | 107      | 50.47                | 49.53 (53)                 | -                     | 0.93 (1)              | -                                 |
| Prostate            | FHCRC, 2016               | 136      | 48.53                | 43.38 (59)                 | 2.94 (4)              | 2.21 (3)              | -                                 |
| Ovarian             | TCGA                      | 316      | 42.41                | 41.14 (130)                | 0.63 (2)              | 0.32 (1)              | 0.32 (1)                          |
| Esophagus           | TCGA                      | 184      | 30.98                | 27.72 (51)                 | -                     | 3.26 (6)              | 0.54 (1)                          |
| Breast              | METABRIC                  | 2051     | 28.38                | 28.38 (582)                | -                     | -                     | -                                 |
| The MBC Project     | Provisional, October 2017 | 103      | 27.18                | 26.21 (27)                 | 0.97 (1)              | -                     | -                                 |
| Prostate            | SU2C                      | 150      | 26.67                | 23.33 (35)                 | -                     | 2.67 (4)              | 0.67 (1)                          |
| Stomach/Esophageal  | TCGA                      | 265      | 25.66                | 23.02 (61)                 | 0.38 (1)              | 1.51 (4)              | 0.75 (2)                          |
| Breast              | TCGA                      | 963      | 23.26                | 22.74 (219)                | -                     | 0.31 (3)              | 0.21 (2)                          |
| Liver               | TCGA                      | 366      | 21.13                | 20.66 (44)                 | -                     | 0.47 (1)              | 0.27 (1)                          |

128

129

130

131

132

133

134

135

136

137

138

139

140

141 **Supplementary Table S10.** Alteration frequency of a five-gene signature (*POU5F1P1*,  
 142 *PRDM14*, *FAM84B*, *TCF7L2*, *HLA-C*) in Cancer.

| <b>Cancer types</b>    | <b>Data source</b>        | <b>N</b> | <b>Frequency (%)</b> | <b>Amplification % (N)</b> | <b>Deletion % (N)</b> | <b>Mutation % (N)</b> | <b>Multiple alterations % (N)</b> |
|------------------------|---------------------------|----------|----------------------|----------------------------|-----------------------|-----------------------|-----------------------------------|
| NEP                    | Trento/Comell/Broad 2016  | 107      | 52.34                | 50.47 (54)                 | -                     | 0.93 (1)              | 0.93 (1)                          |
| Prostate               | FHCRC, 2016               | 136      | 50.74                | 42.65 (58)                 | 2.94 (4)              | 4.41 (6)              | 0.74 (1)                          |
| Ovarian                | TCGA                      | 316      | 45.57                | 43.99 (139)                | 0.63 (2)              | 0.63 (2)              | 0.32 (1)                          |
| Esophagus              | TCGA                      | 184      | 33.70                | 28.26 (52)                 | -                     | 4.89 (9)              | 0.54 (1)                          |
| Stomach/<br>Esophageal | TCGA                      | 265      | 33.21                | 27.55 (73)                 | 0.75 (2)              | 3.4 (9)               | 1.51 (4)                          |
| The MBC Project        | Provisional, October 2017 | 103      | 32.04                | 31.07 (32)                 | 0.97 (1)              | -                     | -                                 |
| Breast                 | METABRIC                  | 2051     | 29.11                | 29.11 (597)                | -                     | -                     | -                                 |
| Prostate               | SU2C                      | 150      | 28.67                | 24.67 (37)                 | 0.67 (1)              | 2.67 (4)              | 0.67 (1)                          |
| Breast                 | TCGA                      | 963      | 24.92                | 23.05 (222)                | 0.42 (4)              | 1.04 (10)             | 0.42 (4)                          |
| Liver                  | TCGA                      | 366      | 23.52                | 19.67 (72)                 | 0.82 (3)              | 2.73 (10)             | 0.27 (1)                          |
| Pancreas               | UTSW                      | 109      | 22.94                | 19.27 (21)                 | 1.83 (2)              | 1.83 (2)              | -                                 |
| Stomach                | TCGA                      | 393      | 22.39                | 13.99 (55)                 | 0.76 (3)              | 6.36 (25)             | 1.27 (5)                          |
| Colorectal             | TCGA                      | 220      | 20.45                | 8.64 (19)                  | 2.73 (6)              | 9.09 (20)             | -                                 |

143

144

145

146

147

148

149

150

151

152

153

154

155 **Supplementary Table S11.** Percentages of alterations in *POU5F1P1*, *PRDM14*, and  
 156 *FAM84B*.

| <b>Cancer types</b> | <b><i>POU5F1P1</i></b> | <b><i>PRDM14</i></b> | <b><i>FAM84B</i></b> |
|---------------------|------------------------|----------------------|----------------------|
| NEP                 | 52%                    | 53%                  | 53%                  |
| Prostate            | 44%                    | 28%                  | 33%                  |
| Ovarian             | 40%                    | 9%                   | 39%                  |
| Esophagus           | 28%                    | 6%                   | 24%                  |
| Breast              | 26%                    | 16%                  | 25%                  |
| The MBC Project     | 26%                    | 8%                   | 26%                  |
| Prostate            | 13%                    | 18%                  | 13%                  |
| Stomach/Esophageal  | 23%                    | 6%                   | 17%                  |
| Breast              | 22%                    | 10%                  | 20%                  |
| Liver               | 18%                    | 12%                  | 18%                  |

157  
 158  
 159  
 160  
 161  
 162  
 163  
 164  
 165  
 166  
 167  
 168  
 169  
 170  
 171  
 172  
 173

174 **Supplementary Table S12.** Percentages of alterations in *POU5F1P1*, *PRDM14*, *FAM84B*, *TCF7L2*, and  
 175 *HLA-C*.

| <b>Cancer types</b> | <b><i>POU5F1P1</i></b> | <b><i>PRDM14</i></b> | <b><i>FAM84B</i></b> | <b><i>TCF7L2</i></b> | <b><i>HLA-C</i></b> |
|---------------------|------------------------|----------------------|----------------------|----------------------|---------------------|
| NEP                 | 52.0%                  | 53.0%                | 53.0%                | 8.0%                 | 21%                 |
| Prostate            | 44.0%                  | 28.0%                | 33.0%                | 4.0%                 | 6%                  |
| Ovarian             | 40.0%                  | 9.0%                 | 39.0%                | 3.0%                 | 0%                  |
| Esophagus           | 28.0%                  | 6.0%                 | 24.0%                | 1.1%                 | 1.6%                |
| Stomach/Esophageal  | 23.0%                  | 6.0%                 | 17.0%                | 4.0%                 | 7%                  |
| The MBC Project     | 26.0%                  | 8.0%                 | 26.0%                | 9.0%                 | 1.3%                |
| Breast              | 26.0%                  | 16.0%                | 25.0%                | 0.3%                 | 1%                  |
| Prostate            | 13.0%                  | 18.0%                | 13.0%                | 2.7%                 | 0%                  |
| Breast              | 22.0%                  | 10.0%                | 20.0%                | 1.2%                 | 0.6%                |
| Liver               | 18.0%                  | 12.0%                | 18.0%                | 1.9%                 | 0.3%                |
| Pancreas            | 14.0%                  | 5.0%                 | 14.0%                | 1.8%                 | 10%                 |
| Stomach             | 14.0%                  | 5.0%                 | 10.0%                | 5.0%                 | 1.8%                |
| Colorectal          | 7.0%                   | 6.0%                 | 6.0%                 | 10.0%                | 0.9%                |

176

177

178

179

180

181

182

183

184

185

186

187

188

189

190 **Supplementary Table S13.** *POU5F1P3* expression in each Cancer types type.

| <b>Cancer types</b> | <b>Cancer subtype</b>                          | <b><i>p</i>-value</b> | <b>Fold change</b> | <b>Rank (%)</b> | <b>Sample</b> | <b>Reference</b> |
|---------------------|------------------------------------------------|-----------------------|--------------------|-----------------|---------------|------------------|
| Breast              | Invasive Breast Carcinoma Stroma               | 3.49E-22              | -3.871             | 5               | 59            | [3]              |
| Colorectal          | Rectal Adenocarcinoma                          | 8.66E-23              | 2.608              | 4               | 130           | [5]              |
|                     | Rectal Adenocarcinoma                          | 1.06E-10              | 2.441              | 11              | 237           | [17]             |
|                     | Colon Adenocarcinoma                           | 5.04E-11              | 2.485              | 11              | 237           | [17]             |
|                     | Colorectal Carcinoma                           | 9.67E-05              | 1.143              | 14              | 105           | [18]             |
|                     | Colorectal Carcinoma                           | 2.17E-04              | 3.414              | 23              | 82            | [19]             |
|                     | Cecum Adenocarcinoma                           | 1.58E-04              | 1.908              | 22              | 237           | [17]             |
| Kidney              | Hereditary Clear Cell Renal Cell Carcinoma     | 2.02E-12              | 2.508              | 2               | 70            | [15]             |
|                     | Non-Hereditary Clear Cell Renal Cell Carcinoma | 1.88E-06              | 2.021              | 8               | 70            | [15]             |
| Other               | Seminoma, NOS                                  | 2.03E-09              | 20.006             | 2               | 107           | [9]              |
|                     | Mixed Germ Cell Tumor, NOS                     | 2.24E-09              | 4.98               | 6               | 107           | [9]              |
|                     | Embryonal Carcinoma, NOS                       | 1.78E-06              | 9.725              | 9               | 107           | [9]              |

191

192

193

194

195

196

197

198

199

200

201

202

203

204

205

206 **Supplementary Table S14.** Association of *POU5F1P3* expression and survival in cancer  
 207 patients (PrognScan).

| Cancer types | N   | Cox<br><i>p</i> -value | HR   | Endpoint                         | Dataset  | Probe ID          |
|--------------|-----|------------------------|------|----------------------------------|----------|-------------------|
| Blood        | 559 | 0.002145               | 0.71 | Disease Specific Survival        | GSE2658  | 210265_x_at       |
| Breast       | 77  | 0.016679               | 86.7 | Relapse Free Survival            | GSE9195  | 210265_x_at       |
| Lung         | 117 | 0.023852               | 0.67 | Overall Survival                 | GSE13213 | A_24_P383640      |
|              | 138 | 0.049494               | 0    | Relapse Free Survival            | GSE8894  | 210265_x_at       |
| Eye          | 63  | <u>0.024368</u>        | 3.23 | Distant Metastasis Free Survival | GSE22138 | 210265_x_at       |
| Head & Neck  | 28  | <u>0.037561</u>        | 0.52 | Relapse Free Survival            | GSE2837  | g12382251_3p_x_at |

208

209

210

211

212

213

214

215

216

217

218

219

220

221

222

223

224 **Supplementary Table S15.** *POU5F1P4* expression in each Cancer types.

| <b>Cancer types</b> | <b>Cancer subtype</b>                          | <b><i>p</i>-value</b> | <b>Fold change</b> | <b>Rank (%)</b> | <b>Sample</b> | <b>Reference</b> |
|---------------------|------------------------------------------------|-----------------------|--------------------|-----------------|---------------|------------------|
| Brain and CNS       | Oligodendroglioma                              | 6.33E-06              | 2.537              | 9               | 180           | [20]             |
|                     | Glioblastoma                                   | 1.95E-04              | 1.932              | 23              | 180           | [20]             |
| Breast              | Invasive Breast Carcinoma Stroma               | 9.42E-22              | -13.876            | 6               | 59            | [3]              |
| Colorectal          | Rectal Adenocarcinoma                          | 1.44E-20              | 2.188              | 5               | 130           | [5]              |
|                     | Colon Adenocarcinoma                           | 8.83E-05              | 1.489              | 14              | 105           | [6]              |
|                     | Rectosigmoid Adenocarcinoma                    | 1.23E-04              | 1.443              | 8               | 105           | [6]              |
|                     | Colon Adenocarcinoma                           | 2.98E-09              | 1.918              | 15              | 237           | [17]             |
|                     | Colorectal Carcinoma                           | 5.75E-05              | 3.055              | 20              | 82            | [19]             |
|                     | Rectal Adenocarcinoma                          | 1.31E-07              | 1.751              | 17              | 237           | [17]             |
| Gastric             | Diffuse Gastric Adenocarcinoma                 | 8.17E-07              | -2.582             | 1               | 69            | [21]             |
| Kidney              | Clear Cell Renal Cell Carcinoma                | 1.85E-05              | 4.847              | 6               | 20            | [7]              |
|                     | Hereditary Clear Cell Renal Cell Carcinoma     | 6.51E-08              | 2.374              | 7               | 70            | [15]             |
|                     | Non-Hereditary Clear Cell Renal Cell Carcinoma | 3.31E-05              | 1.835              | 11              | 70            | [15]             |
|                     | Papillary Renal Cell Carcinoma                 | 3.29E-05              | 1.359              | 16              | 92            | [8]              |
| Other               | Seminoma, NOS                                  | 2.25E-10              | 14.173             | 1               | 107           | [9]              |
|                     | Mixed Germ Cell Tumor, NOS                     | 1.06E-09              | 4.573              | 5               | 107           | [9]              |
|                     | Embryonal Carcinoma, NOS                       | 1.80E-06              | 7.915              | 9               | 107           | [9]              |

225

226

227

228

229

230

231

232

233

234

235

236

237



238 **Supplementary Table S16.** Association of *POU5F1P4* expression and survival in cancer  
 239 patients (PrognScan).

| Cancer types | N   | Cox <i>p</i> -value | HR    | Endpoint                         | Dataset           | Probe ID          |
|--------------|-----|---------------------|-------|----------------------------------|-------------------|-------------------|
| Breast       | 77  | 0.046795            | 28.12 | Relapse Free Survival            | GSE9195           | 210905_x_at       |
|              | 115 | 0.005326            | 5.38  | Distant Metastasis Free Survival | GSE19615          | 210905_x_at       |
|              | 125 | 0.049525            | 0.76  | Distant Metastasis Free Survival | GSE2990           | 210905_x_at       |
| Ovarian      | 185 | 0.027097            | 0.52  | Overall Survival                 | GSE26712          | 210905_x_at       |
|              | 185 | 0.00484             | 0.47  | Disease Free Survival            | GSE26712          | 210905_x_at       |
| Head & Neck  | 28  | 0.022458            | 1.41  | Relapse Free Survival            | GSE2837           | g12382245_3p_x_at |
| Lung         | 129 | 0.013688            | 0.98  | Overall Survival                 | GSE4573           | 210905_x_at       |
|              | 82  | 0.00535             | 5.95  | Overall Survival                 | jacob-00182-CANDF | 210905_x_at       |

240

241

242

243

244

245

246

247

248

249

250

251

252

253

254

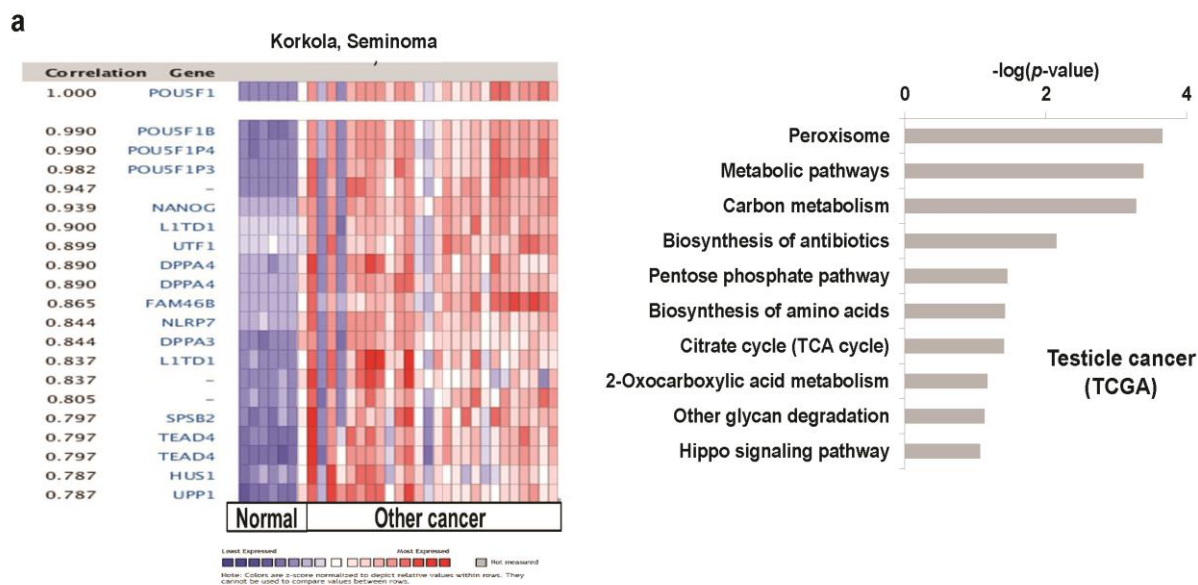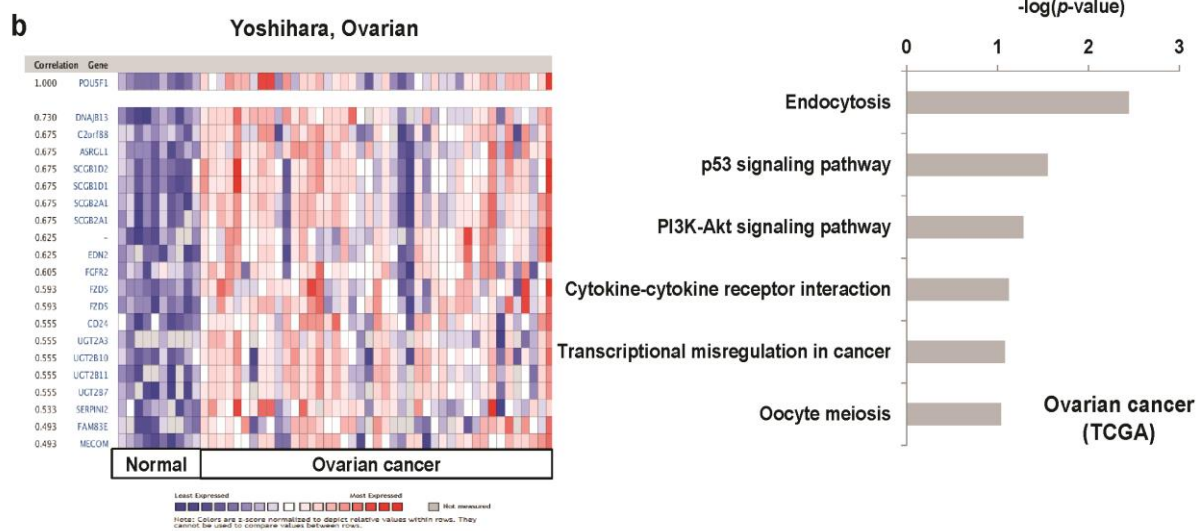

256

257

258

259

260 **Supplementary Figure S1.** Co-expression pattern of *POU5F1* in several cancer types: *OCT4*  
261 (*POU5F1*) was co-expressed with the indicated genes across a panel of across 26 other  
262 cancer and 7 normal samples (**a**, left panel) and 43 ovarian cancer and 10 normal samples (**b**,  
263 left panel). Bar length represents the significance and negative logarithm of enrichment *p*-  
264 value. The co-expressed genes were retrieved from TCGA database using cBioPortal web.  
265 Using the co-expressed genes list, top 10 significant GO processes were confirmed using  
266 DAVID functional annotation in testicle (**a**, right panel) and ovarian (**b**, right panel) cancer.  
267 Bar length represents the significance and negative logarithm of enrichment *p*-value.

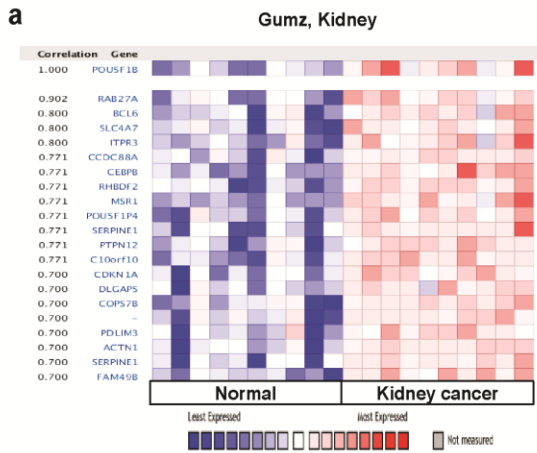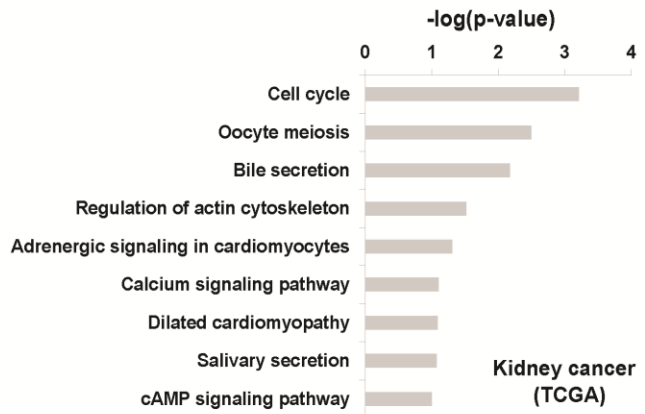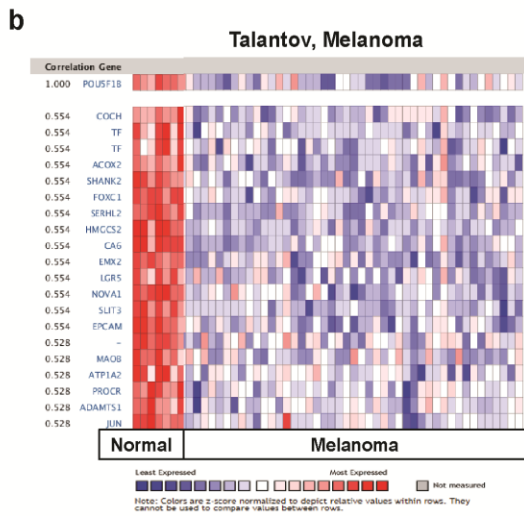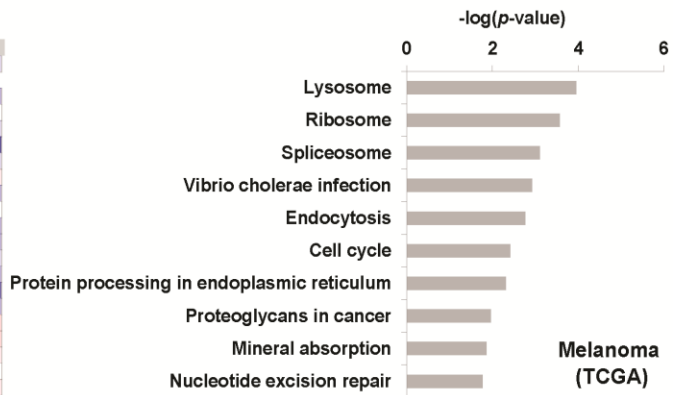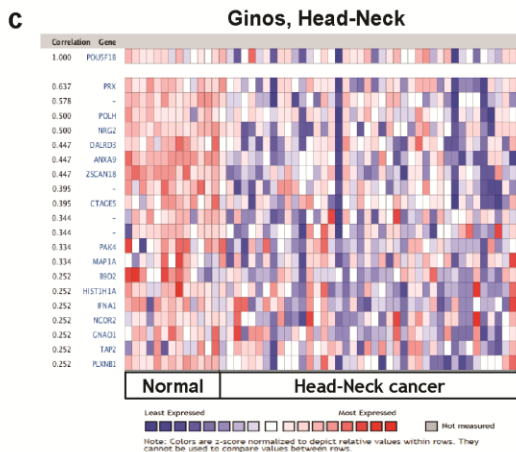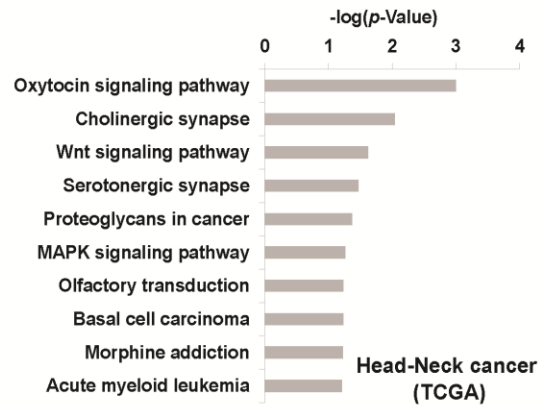

268

269

270

271 **Supplementary Figure S2.** Co-expression pattern of *POU5F1P1* in various cancer types:  
272 *POU5F1P1* was co-expressed with the presented genes across a panel of 42 kidney cancer  
273 and 11 normal samples (**a**, left panel). In a panel of 45 melanoma and 7 normal samples,  
274 *POU5F1P1* was co-expressed with the presented genes (**b**, left panel). *POU5F1P1* was also  
275 co-expressed with the presented genes across 42 head-neck cancer and 13 normal sample (**c**,  
276 left panel). Bar length represents the significance and negative logarithm of enrichment *p*-  
277 value. The co-expressed genes were retrieved from TCGA database using cBioPortal web.  
278 Using the co-expressed genes list, top 10 significant GO processes were confirmed using  
279 DAVID functional annotation in kidney (**a**, right panel), melanoma (**b**, right panel) and head-  
280 neck (**c**, right panel) cancer. Bar length represents the significance and negative logarithm of  
281 enrichment *p*-value.

282

283

284

285

286

287

288

289

290

291

292

293

294

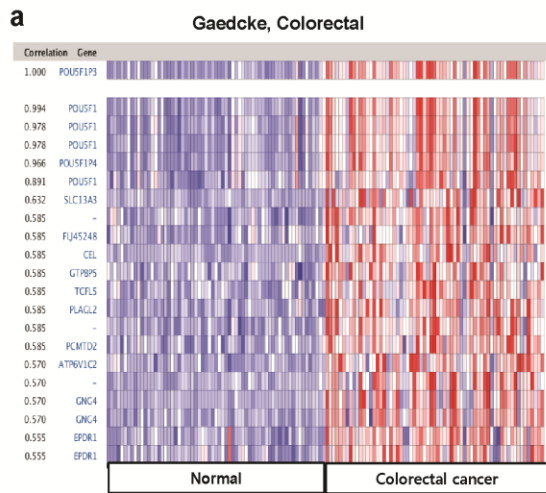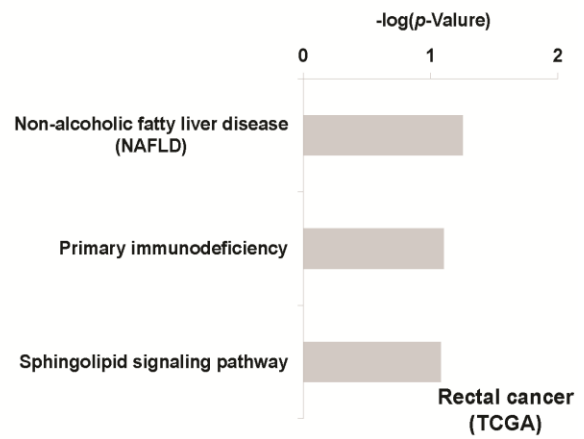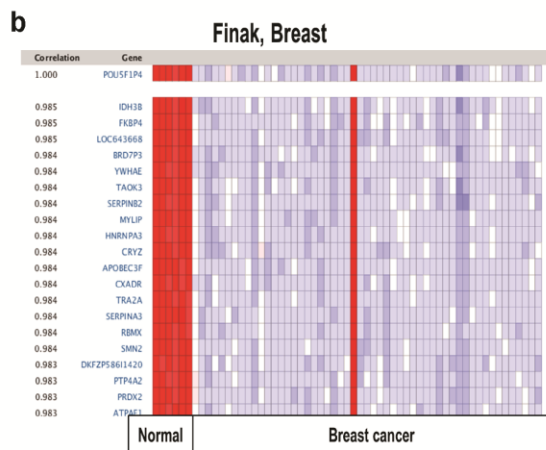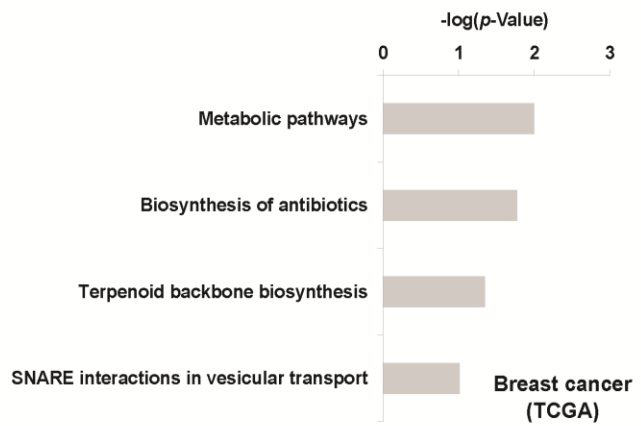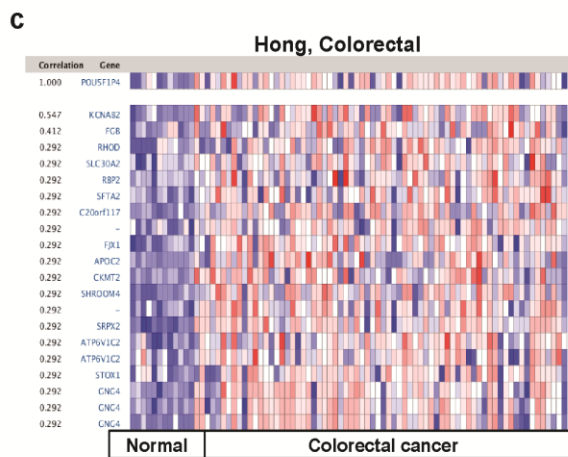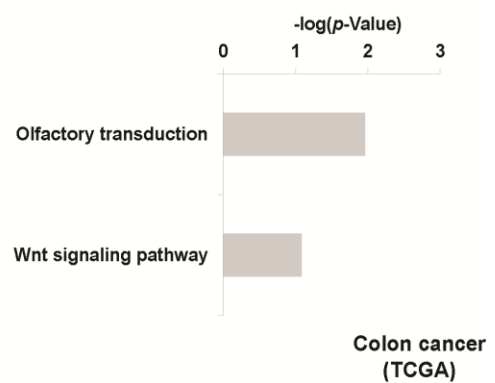

295

296

297 **Supplementary Figure S3.** Co-expression pattern of POU5F1P3 and POU5F1P4 in various  
298 cancer types: *POU5F1P3* was co-expressed with the presented genes across a panel of 65  
299 colorectal cancer and 65 normal samples (**a**, left panel). *POU5F1P4* was co-expressed with  
300 the indicated genes across a panel of 53 breast cancer and 6 normal sample and 70 colorectal  
301 cancer and 12 normal samples (**b** and **c**, left panel). Bar length represents the significance and  
302 negative logarithm of enrichment  $p$ -value. The co-expressed genes were retrieved from  
303 TCGA database using cBioPortal web. Using the co-expressed genes list, top significant GO  
304 processes related to POU5F1P3 were confirmed using DAVID functional annotation in  
305 colorectal cancer (a, right panel). Significant GO processes related to POU5F1P4 were also  
306 confirmed using DAVID functional annotation in breast (**b**, right panel) and colorectal (**c**,  
307 right panel) cancer. Bar length represents the significance and negative logarithm of  
308 enrichment  $p$ -value.

309

310

311

312

313

314

315

316

317

318

319

320

321

322

323

324

325

326

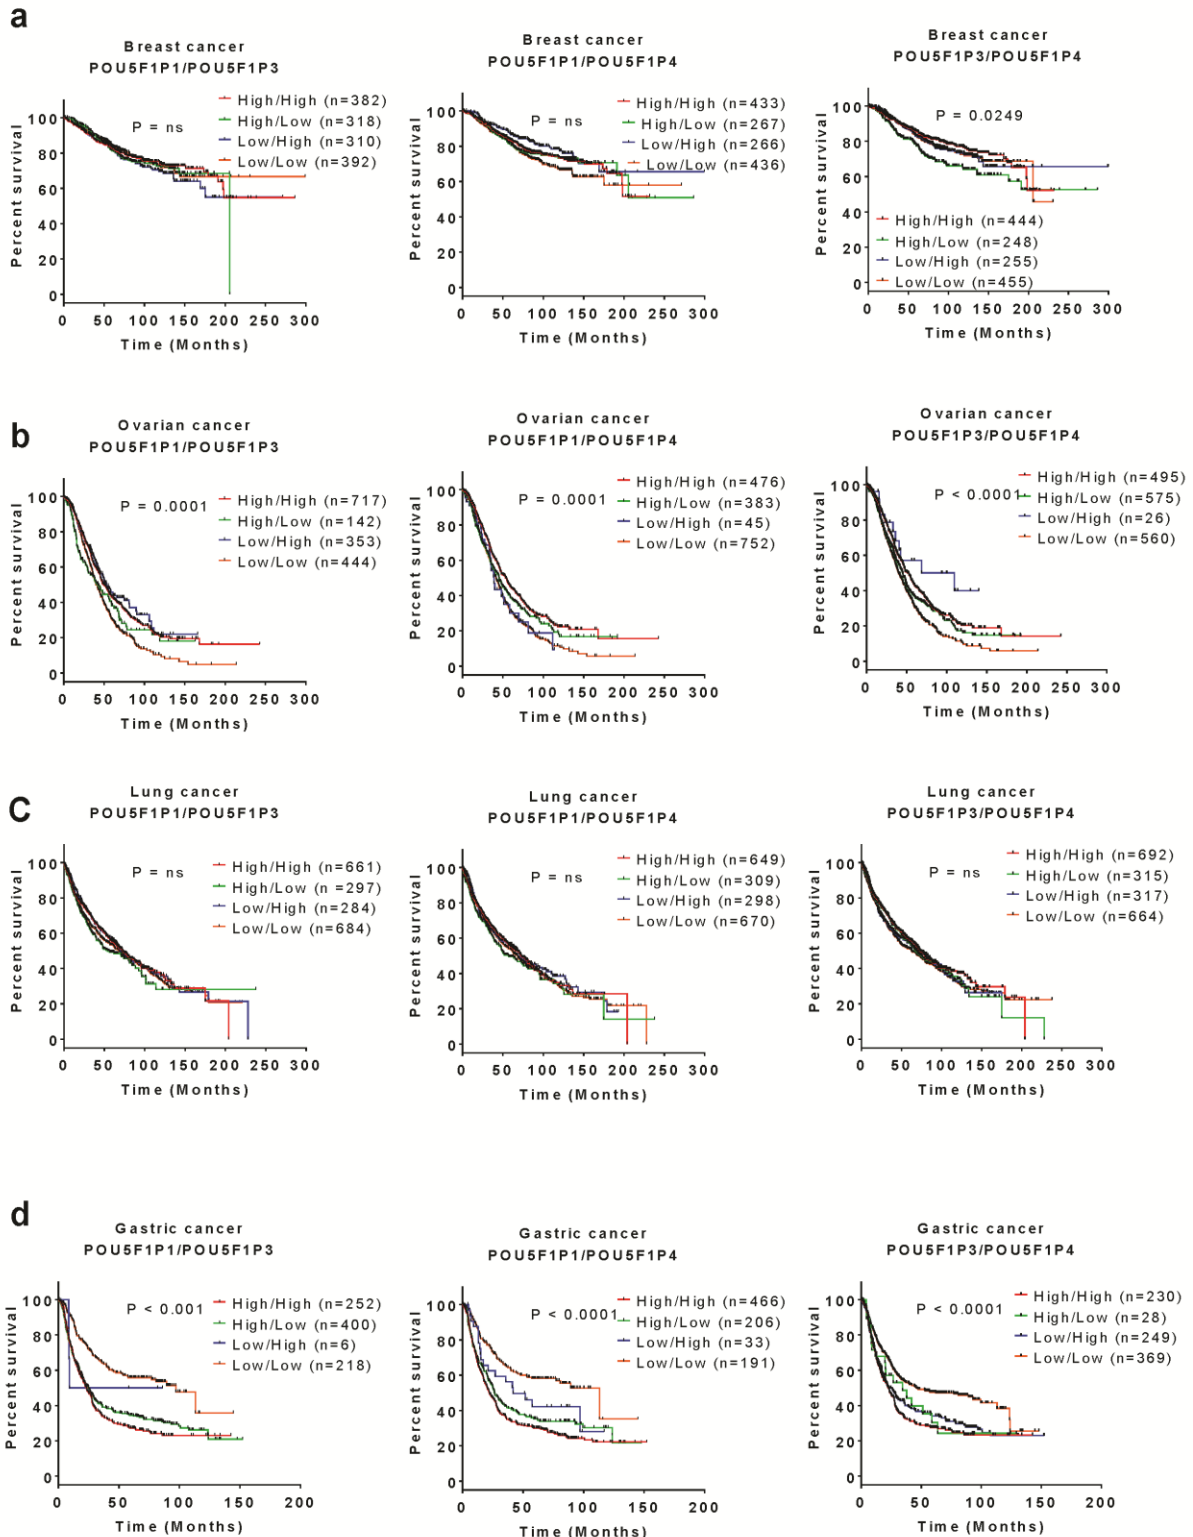

327  
328  
329



330 **Supplementary Figure S4.** Expression co-occurrence of *OCT4* pseudogenes in relation to  
331 the clinical prognosis of cancer patients. The multivariate survival curves compare the  
332 clinical prognosis in patients with high/high (red), high/low (green), low/high (blue), and  
333 low/low (orange) expression co-occurrence of *POU5F1P1/POU5F1P3*,  
334 *POU5F1P1/POU5F1P4*, and *POU5F1P3/POU5F1P4* in breast (a), ovarian (b), lung (c) and  
335 gastric (d) cancers. The clinical outcome data were retrieved from the Kaplan-Meier plotter  
336 database. Information indicating statistical significance represents  $p < 0.05$ , and a non-  
337 significant  $p$ -value is expressed as 'ns' in the graph.

338

### 339 **Supplementary References**

- 340 1. Modlich, O. *et al.* Identifying superficial, muscle-invasive, and metastasizing transitional cell  
341 carcinoma of the bladder: use of cDNA array analysis of gene expression profiles. *Clin. Cancer types*  
342 *Res.* **10**, 3410-3421 (2004).
- 343 2. Sanchez-Carbayo, M., Socci, N. D., Lozano, J., Saint, F. & Cordon-Cardo, C. Defining molecular  
344 profiles of poor outcome in patients with invasive bladder Cancer types using oligonucleotide  
345 microarrays. *J. Clin. Oncol.* **24**, 778-789 (2006).
- 346 3. Finak, G. *et al.* Stromal gene expression predicts clinical outcome in breast Cancer types. *Nat. Med.* **14**,  
347 518 (2008).
- 348 4. Ma, X.-J., Dahiya, S., Richardson, E., Erlander, M. & Sgroi, D. C. Gene expression profiling of the  
349 tumor microenvironment during breast Cancer types progression. *Breast Cancer types Res.* **11**, R7  
350 (2009)..
- 351 5. Gaedcke, J. *et al.* Mutated KRAS results in overexpression of DUSP4, a MAP-kinase phosphatase,  
352 and SMYD3, a histone methyltransferase, in rectal carcinomas. *Genes Chromosomes Cancer types* **49**,  
353 1024-1034 (2010)..
- 354 6. Kaiser, S. *et al.* Transcriptional recapitulation and subversion of embryonic colon development by  
355 mouse colon tumor models and human colon Cancer types. *Genome Biol. Evol.* **8**, R131 (2007).
- 356 7. Gumz, M. L. *et al.* Secreted frizzled-related protein 1 loss contributes to tumor phenotype of clear cell  
357 renal cell carcinoma. *Clin. Cancer types Res.* **13**, 4740-4749 (2007).
- 358 8. Jones, J. *et al.* Gene signatures of progression and metastasis in renal cell Cancer types. *Clin. Cancer*  
359 *types Res.* **11**, 5730-5739 (2005).
- 360 9. Korkola, J. E. *et al.* Down-regulation of stem cell genes, including those in a 200-kb gene cluster at  
361 12p13. 31, is associated with in vivo differentiation of human male germ cell tumors. *Cancer types*  
362 *Res.* **66**, 820-827 (2006).
- 363 10. Skotheim, R. I. *et al.* Differentiation of human embryonal carcinomas in vitro and in vivo reveals  
364 expression profiles relevant to normal development. *Cancer types Res.* **65**, 5588-5598 (2005).
- 365 11. Yoshihara, K. *et al.* Gene expression profiling of advanced-stage serous ovarian Cancer types  
366 distinguishes novel subclasses and implicates ZEB2 in tumor progression and prognosis. *Cancer types*  
367 *Sci.* **100**, 1421-1428 (2009).
- 368 12. Hendrix, N. D. *et al.* Fibroblast growth factor 9 has oncogenic activity and is a downstream target of  
369 Wnt signaling in ovarian endometrioid adenocarcinomas. *Cancer types Res.* **66**, 1354-1362 (2006).
- 370 13. Detwiller, K. Y. *et al.* Analysis of hypoxia-related gene expression in sarcomas and effect of hypoxia  
371 on RNA interference of vascular endothelial cell growth factor A. *Cancer types Res.* **65**, 5881-5889  
372 (2005).
- 373 14. Barretina, J. *et al.* Subtype-specific genomic alterations define new targets for soft-tissue sarcoma  
374 therapy. *Nat. Genet.* **42**, 715 (2010).
- 375 15. Beroukhim, R. *et al.* Patterns of gene expression and copy-number alterations in von-hippel lindau

376 disease-associated and sporadic clear cell carcinoma of the kidney. *Cancer types Res.* **69**, 4674-4681  
377 (2009).

378 16. Talantov, D. *et al.* Novel genes associated with malignant melanoma but not benign melanocytic  
379 lesions. *Clin. Cancer types Res.* **11**, 7234-7242 (2005).

380 17. Weinstein, J. N. *et al.* The Cancer types genome atlas pan-Cancer types analysis project. *Nat. Genet.*  
381 **45**, 1113 (2013).

382 18. Skrzypczak, M. *et al.* Modeling oncogenic signaling in colon tumors by multidirectional analyses of  
383 microarray data directed for maximization of analytical reliability. *Plos One* **5**, e13091 (2010)..

384 19. Hong, Y., Downey, T., Eu, K. W., Koh, P. K. & Cheah, P. Y. A 'metastasis-prone' signature for early-  
385 stage mismatch-repair proficient sporadic colorectal Cancer types patients and its implications for  
386 possible therapeutics. *Clin. Exp. Metastasis* **27**, 83-90 (2010).

387 20. Sun, L. *et al.* Neuronal and glioma-derived stem cell factor induces angiogenesis within the brain.  
388 *Cancer types cell* **9**, 287-300 (2006).

389 21. D'Errico, M. *et al.* Genome-wide expression profile of sporadic gastric Cancer types with  
390 microsatellite instability. *Eur. J. Cancer types* **45**, 461-469 (2009).

391
